# Supplementary material
Source: PubMed Central journal article supplement (PMC2924069)

## SUPPLEMENTAL FIGURE LEGENDS

**Supplemental Figure 1: Species specificity of the anti  $\alpha 1^h$  and  $\alpha 1^r$  subunit antibodies.** We transfected HEK293T cells with empty vector (negative control, shaded histograms), or 0.250  $\mu\text{g}$  of  $\beta 2$  and  $\gamma 2$  subunit cDNA and hemizygous expression of either 0.125  $\mu\text{g}$  of  $\alpha 1^h$  (dotted line) or 0.125  $\mu\text{g}$  of  $\alpha 1^r$  (dashed line). We stained surface (A-B) or total (C) receptors with the anti  $\alpha 1^h$  antibody (A, C) or anti  $\alpha 1^r$  antibody (B) and quantified antibody staining by flow cytometry. These data demonstrated that these antibodies were species specific; staining of the  $\alpha 1^h$  subunit by the anti  $\alpha 1^r$  antibody or staining of the  $\alpha 1^r$  subunit by the anti  $\alpha 1^h$  antibody accounted for  $0 \pm 0.4\%$  that of specific staining ( $N \geq 3$ ).

**Supplemental Figure 2: Effect of the transfection of the pmaxGFP plasmid on  $\alpha 1\beta 2\gamma 2$  and  $\alpha 3\beta 2\gamma 2$  receptor expression.** We transfected HEK293T cells with hemizygous  $\alpha 1^h\beta 2\gamma 2$  (A, B) or wild type  $\alpha 3\beta 2\gamma 2$  (C) receptors and 2  $\mu\text{g}$  of either empty plasmid (control), or the pmaxGFP, or  $\alpha 1(\text{AD})^r$  plasmids ( $N \geq 3$ ). Surface (A, C) and total (B)  $\alpha 1^h$  (A-B) or  $\alpha 3$  subunit expression was determined by flow cytometry using anti  $\alpha 1^h$ -647 or anti  $\alpha 3$  subunit antibodies. The bar graphs depict the mean specific  $\alpha 1^h$ -647 or  $\alpha 3$  subunit fluorescence normalized to that of control samples. While the  $\alpha 1(\text{AD})^r$  subunit caused significant reductions in  $\alpha 1^h$  and  $\alpha 3$  subunit expression ( $P < 0.004$ ), transfection of the pmaxGFP plasmid did not alter the expression of either of these wild type receptors ( $P > 0.513$ ).

**Supplemental Figure 3: Effect of the  $\alpha 1(\text{AD})$  subunit on surface expression of the  $\text{TGF}^{\text{HA}}$  protein.** We transfected HEK293T cells with wild type  $\alpha 1\beta 2\gamma 2$  receptors in addition to 0.250  $\mu\text{g}$  of cDNA encoding  $\text{TGF}^{\text{HA}}$  and with or without 2  $\mu\text{g}$  of the cDNA encoding the  $\alpha 1(\text{AD})$  subunit. We performed flow cytometry using an anti-HA-647 antibody. A sample histogram is shown in panel A with negative control cells depicted as a shaded histogram, samples transfected in the absence of  $\alpha 1(\text{AD})$  shown with the solid line and samples transfected with  $\alpha 1(\text{AD})$  depicted in a dashed line. Quantification (B) demonstrated that the  $\alpha 1(\text{AD})$  subunit did not reduce expression of the  $\text{TGF}^{\text{HA}}$  protein ( $116 \pm 10\%$ ;  $P = 0.169$ ;  $N = 5$ ).

Supplemental Figure 1

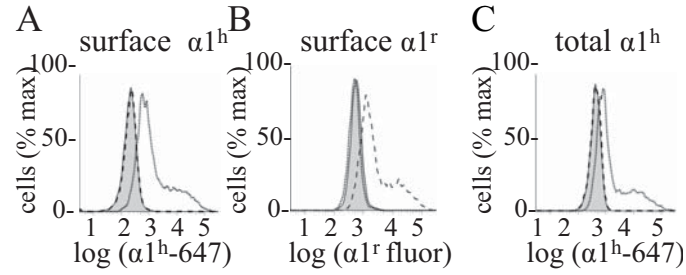

Supplemental Figure 2

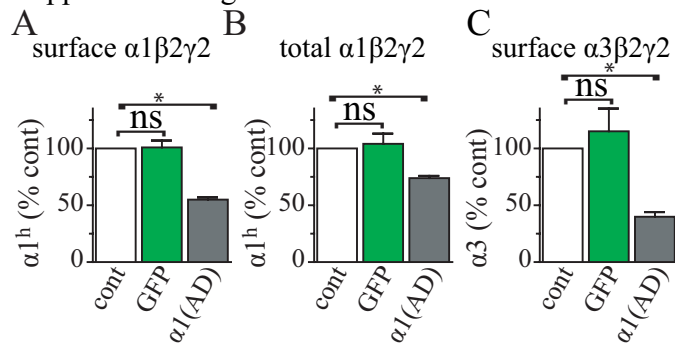

Supplemental Figure 3

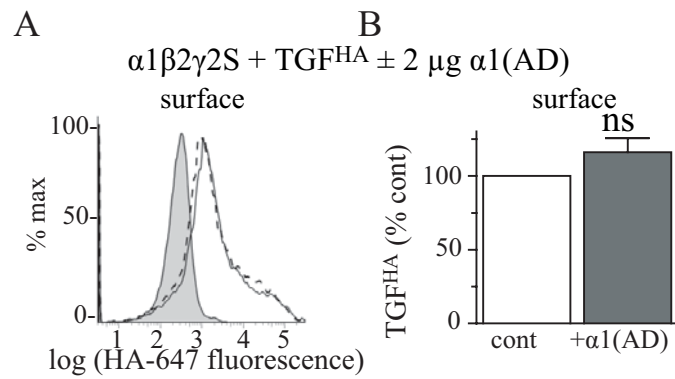

Supplement: supp_M110.142299_jbc.M110.142299-1.pdf [file supp_M110.142299_jbc.M110.142299-1.pdf]
